# Supplementary material
Source: Springer Nature journal article supplement (https://www.springermedizin.de/resource/supplementary/12885_2009_2247_MOESM2_ESM.pdf/9460848)

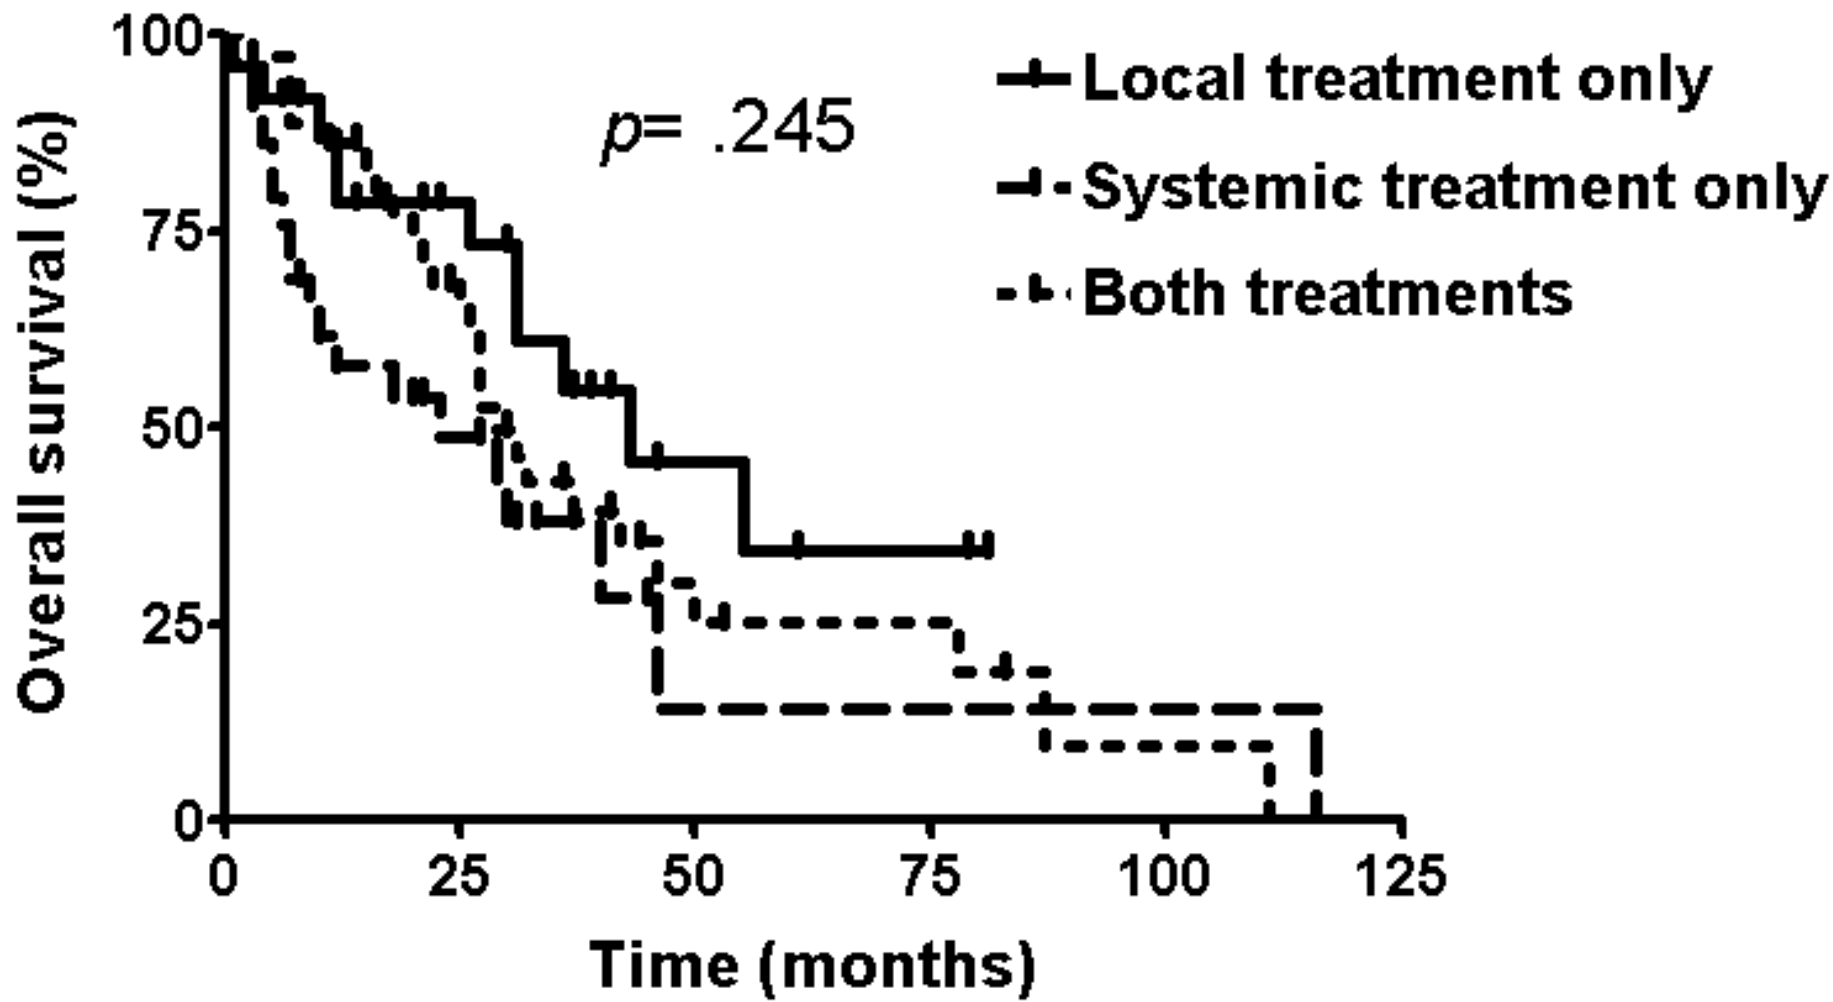

Supplement: MOESM2 [file 9460848]
